# Supplementary material for: Three-dimensional Ag–tannic acid–graphene as an antibacterial material
Source: Royal Society of Chemistry journal article supplement (doi:10.1039/c6nj00185h), 2016-01-01
Supplement: c6nj00185h1.pdf [file c6nj00185h1.pdf]

## Supporting Information

### Release of TA from GR/TA and GR/TA/Ag composites

0.5 g of each sample (GR/TA, GR/TA/Ag-1, GR/TA/Ag-10, and GR/TA/Ag-100) was put into flask with 5 mL deionized water at room temperature, respectively. At the stated time interval, the amount of TA released from GR/TA and GR/TA/Ag composite was determined through UV-vis spectroscopy at 214 nm (the maximum absorption wavelength of TA). Each measurement was tested for three times to get the average values with standard deviations.

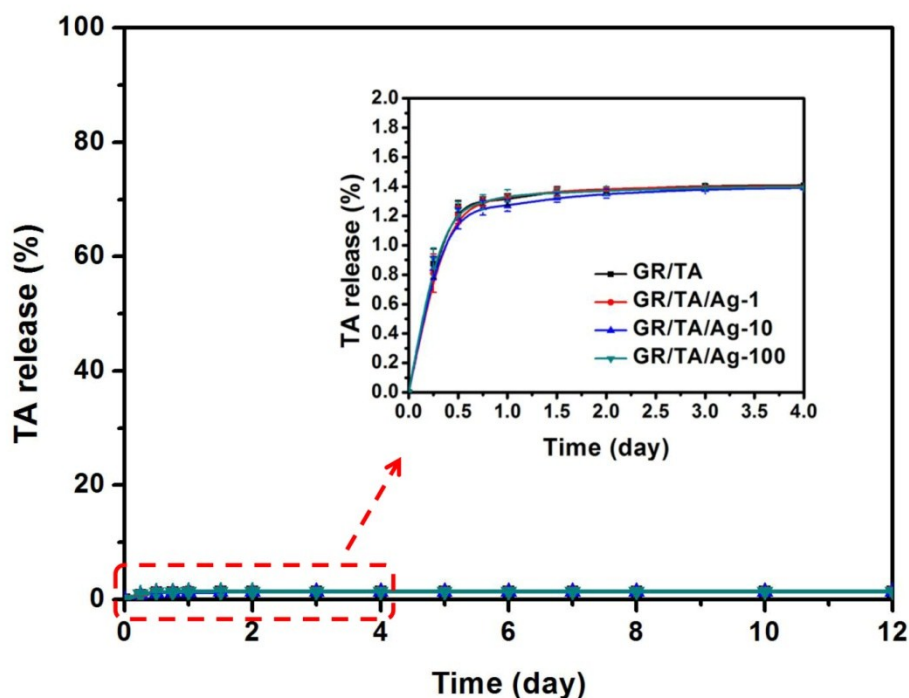

Fig. S1 TA release profiles from GR/TA and GR/TA/Ag composites

TA is readily degradable in aquatic environments. Therefore, the release of TA from GR/TA and GR/TA/Ag composites was investigated, and the TA release profiles were shown in Fig. S1. It can be observed that GR/TA and GR/TA/Ag composites have a very slight release ratio of TA. Only 1.4% of TA is observed to be released from the composite which can be almost neglected.
